# Supplementary material for: LC-HRMS and GC-MS Profiling of Urine Free Cortisol, Cortisone, 6Β-, and 18-Hydroxycortisol for the Evaluation of Glucocorticoid and Mineralocorticoid Disorders
Source: MDPI journal article supplement (doi:10.3390/biom14050558), 2024-05-06

**Supplementary Table S1.** Retention times and monitored ions of the analytes and internal standards (LC-HRMS).

| Ret time [min] | Compound                   | Target ion         | m/z      | Internal standard             | m/z      |
|----------------|----------------------------|--------------------|----------|-------------------------------|----------|
| 2.2            | 6 $\beta$ -hydroxycortisol | [M+H] <sup>+</sup> | 379.2115 | 6 $\beta$ -hydroxycortisol-d4 | 383.2366 |
| 4.7            | 18-hydroxycortisol         | [M+H] <sup>+</sup> | 379.2115 | 18-hydroxycortisol-d4         | 383.2366 |
| 6.8            | Cortisol                   | [M+H] <sup>+</sup> | 363.2166 | Cortisol-d4                   | 367.2417 |
| 6.9            | Cortisone                  | [M+H] <sup>+</sup> | 361.2010 | Cortisone-d8                  | 369.2512 |

**Supplementary Table S2.** Recovery of added steroids in human urine (n=3), GC-MS method.

| Steroid            | Urine (µg/L) | Added (µg/L) | Obtained (µg/L) | Accuracy (%) |
|--------------------|--------------|--------------|-----------------|--------------|
| Cortisol           | 59±19        | 125          | 183±31          | 99±7         |
| Cortisone          | 67±25        | 125          | 193±10          | 100±5        |
| 6β-hydroxycortisol | 52±14        | 125          | 175±9           | 98±5         |
| 18-hydroxycortisol | 219±15       | 125          | 353±28          | 107±8        |

**Supplementary Table S3.** Accuracy of added steroids in human urine (n=3), LC-HRMS method.

| Steroid            | Urine concentration range (µg/L) | Added (µg/L) | Mean recovery (%) |
|--------------------|----------------------------------|--------------|-------------------|
| Cortisol           | 30-76                            | 12.5         | 91                |
|                    |                                  | 25           | 98                |
| Cortisone          | 12-34                            | 12.5         | 107               |
|                    |                                  | 25           | 88                |
| 6β-hydroxycortisol | 104-192                          | 12.5         | 96                |
|                    |                                  | 25           | 94                |
| 18-hydroxycortisol | 34-146                           | 12.5         | 96                |
|                    |                                  | 25           | 96                |

**Supplementary Table S4.** Stability in the autosampler at 8°C (GC-MS method) and room temperature (LC-HRMS method) expressed as accuracy values of quality control and urine samples after 24h and 72 h. QC: quality control.

|                           | GC-MS |       |       | LC-HRMS |       |       |
|---------------------------|-------|-------|-------|---------|-------|-------|
|                           | µg/L  | 24h   | 72h   | µg/L    | 24h   | 72h   |
| <b>Cortisol</b>           |       |       |       |         |       |       |
| QC1                       | 26    | 105.8 | 113.5 | 82      | 96.4  | 100.2 |
| QC2                       | 138   | 100.7 | 112.6 | 160     | 100.8 | 101.4 |
| Urine                     | 58    | 106.0 | 112.1 | 106     | 106.3 | 96.9  |
| <b>Cortisone</b>          |       |       |       |         |       |       |
| QC1                       | 26    | 98.1  | 101.9 | 82      | 105.4 | 102.9 |
| QC2                       | 130   | 101.2 | 104.2 | 164     | 100.6 | 99.5  |
| Urine                     | 70    | 103.6 | 108.6 | 134     | 100.2 | 97.1  |
| <b>6β-hydroxycortisol</b> |       |       |       |         |       |       |
| QC1                       | 26    | 98.1  | 96.2  | 80      | 100.9 | 99.3  |
| QC2                       | 135   | 99.3  | 100.7 | 158     | 102.0 | 100.9 |
| Urine                     | 224   | 99.8  | 100.9 | 176     | 96.9  | 97.7  |
| <b>18-hydroxycortisol</b> |       |       |       |         |       |       |
| QC1                       | 25    | 103.9 | 103.9 | 76      | 96.2  | 89.1  |
| QC2                       | 132   | 100.0 | 98.9  | 164     | 95.8  | 84.9  |
| Urine                     | 54    | 98.1  | 100.9 | 106     | 93.8  | 78.5  |

**Supplementary Table S5.** Efficiency of the extraction procedure (n=3).

|                                            | $\mu\text{g/L}$ | Process efficiency (%) |
|--------------------------------------------|-----------------|------------------------|
| <b>Cortisol</b>                            |                 |                        |
|                                            | 12.5            | 75 $\pm$ 8             |
|                                            | 100             | 51 $\pm$ 6             |
|                                            | 250             | 47 $\pm$ 4             |
| <b>Cortisone</b>                           |                 |                        |
|                                            | 12.5            | 86 $\pm$ 9             |
|                                            | 100             | 53 $\pm$ 4             |
|                                            | 250             | 47 $\pm$ 7             |
| <b>6<math>\beta</math>-hydroxycortisol</b> |                 |                        |
|                                            | 12.5            | 28 $\pm$ 4             |
|                                            | 100             | 10 $\pm$ 8             |
|                                            | 250             | 10 $\pm$ 7             |
| <b>18-hydroxycortisol</b>                  |                 |                        |
|                                            | 12.5            | 42 $\pm$ 5             |
|                                            | 100             | 30 $\pm$ 6             |
|                                            | 250             | 25 $\pm$ 5             |

Supplementary Table S6. Summary comparison of the characteristics of the LC-HRMS and the GC-MS method validated in this study and the GC-MS method published by Shackleton et al (31).

| <u>Characteristic</u>       | <u>LC-HRMS</u>                                                                                                                     | <u>GC-MS</u>                                                                                                                      | <u>GC-MS (31)</u>                                                                                                                                                   |
|-----------------------------|------------------------------------------------------------------------------------------------------------------------------------|-----------------------------------------------------------------------------------------------------------------------------------|---------------------------------------------------------------------------------------------------------------------------------------------------------------------|
| <u>Urine volume</u>         | <u>0.5 mL</u>                                                                                                                      | <u>2 mL</u>                                                                                                                       | <u>5 mL (*)</u>                                                                                                                                                     |
| <u>Urine extraction</u>     | <u>Liquid:liquid with dichlorometane</u>                                                                                           | <u>Liquid:liquid with dichlorometane</u>                                                                                          | <u>C18 solid phase extraction with water and methanol</u>                                                                                                           |
| <u>Internal standards</u>   | <u>cortisol-d<sub>4</sub>, cortisone-d<sub>8</sub></u><br><u>6β-hydroxycortisol-d<sub>4</sub> 18-hydroxycortisol-d<sub>4</sub></u> | <u>cortisol-d<sub>4</sub> cortisone-d<sub>8</sub></u><br><u>6β-hydroxycortisol-d<sub>4</sub> 18-hydroxycortisol-d<sub>4</sub></u> | <u>cortisol-d<sub>4</sub> cortisone-d<sub>3</sub> cortisone-d<sub>2</sub> (**)</u><br><u>6β-hydroxycortisol-d<sub>2</sub> 18-hydroxycortisol-d<sub>2</sub> (**)</u> |
| <u>Derivatization</u>       | <u>No</u>                                                                                                                          | <u>methoxyamine hydrochloride (55°C 60 min), BSTFA (2 min, microwave irradiation)</u>                                             | <u>methoxyamine hydrochloride (60°C 60 min), BSTFA (16h, 100°C)</u>                                                                                                 |
| <u>Time of chromatogram</u> | <u>16 minutes</u>                                                                                                                  | <u>35 minutes</u>                                                                                                                 | <u>40 minutes</u>                                                                                                                                                   |
| <u>Acquisition</u>          | <u>Full scan</u>                                                                                                                   | <u>Single ion monitoring</u>                                                                                                      | <u>Single ion monitoring</u>                                                                                                                                        |

(\*) Free and total fraction analysis (\*\*) Non commercial

**Supplementary Figure S1.** Chromatogram of urine samples measured by the GC-MS (A) and LC-HRMS (B) methods.

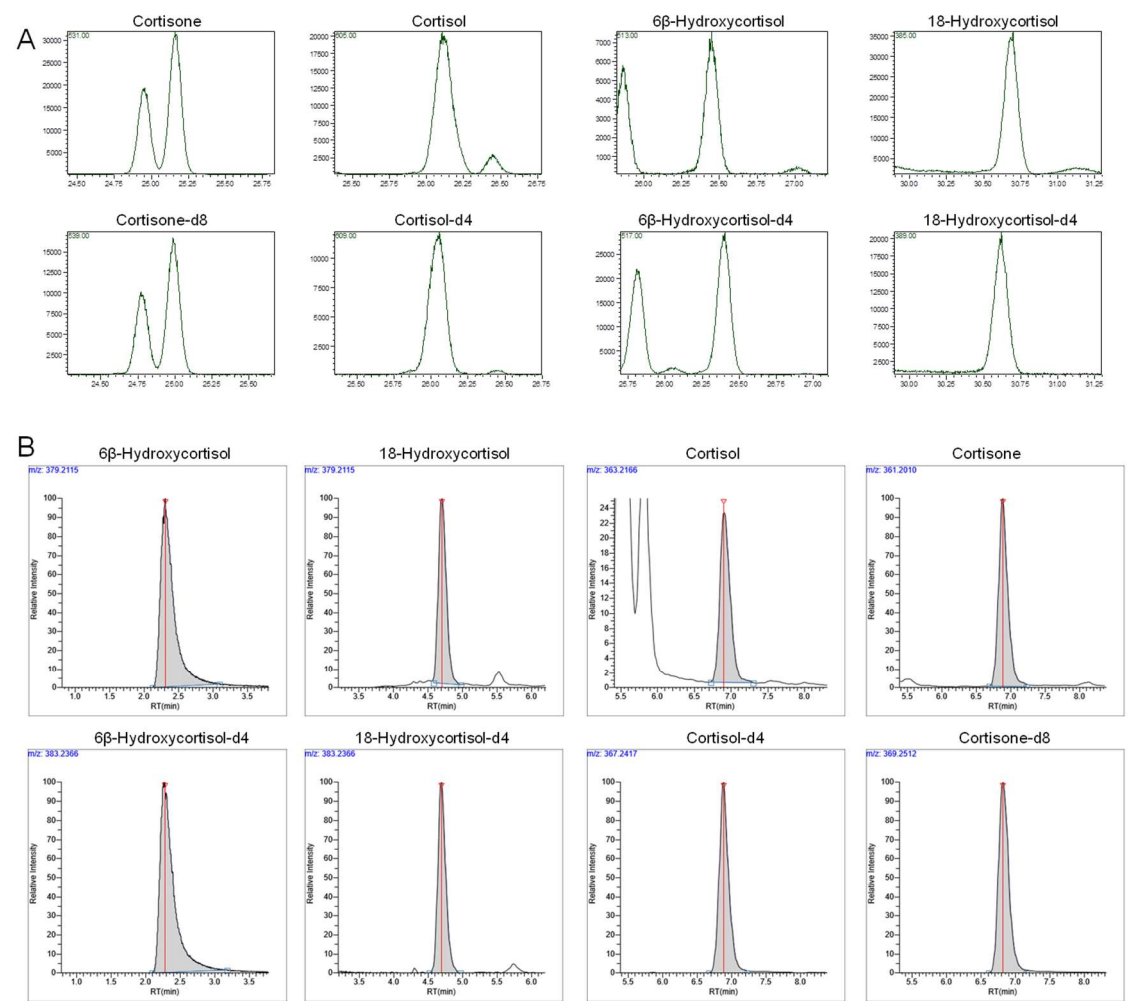

**Supplementary Figure S2. A.** Concentration results of the cortisol measurements of the human serum cortisol certified reference material ERM-DA192 by the GC-MS method. **B.** Cortisol spiked curves in human serums (n=3) compared with the respective curves in methanol measured by the GC-MS method.

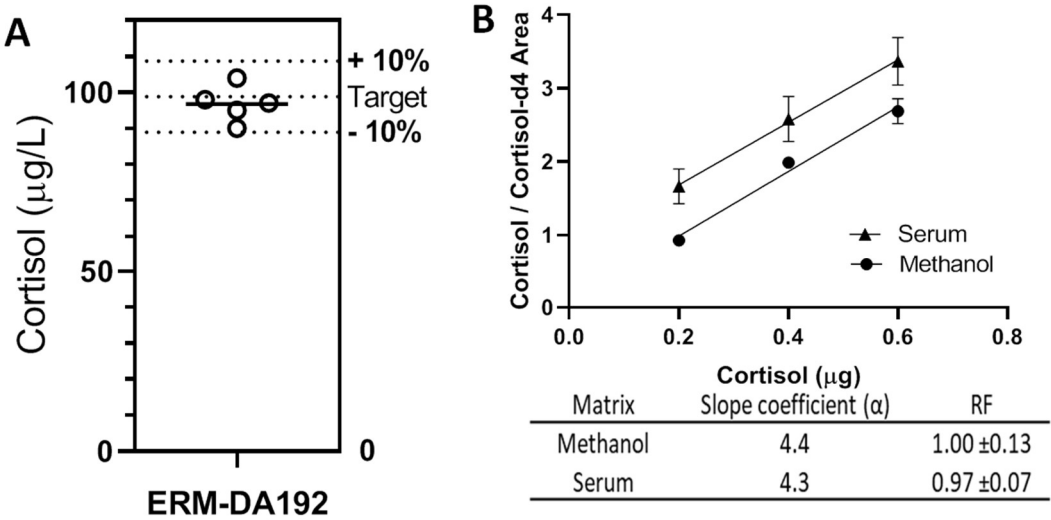

Supplement: s1 [file s1]
